# Supplementary material
Source: HighWire-hosted journal article supplement (https://bmjopen.bmj.com/content/8/5/e019992)
Supplement: inline-supplementary-material-1 [file inline-supplementary-material-1.pdf]

**Supplementary Table 1. Hazard ratios (HRs) for the association of asthma with cardiovascular disease (CVD), coronary heart disease (CHD), and stroke mortality by age in the MJ health check-up programme, Taiwan**

|                                             | N       | CVD mortality |                     |         |              |         | CHD mortality |           |                     |         |              | Stroke mortality |              |           |                     |         |              |         |              |
|---------------------------------------------|---------|---------------|---------------------|---------|--------------|---------|---------------|-----------|---------------------|---------|--------------|------------------|--------------|-----------|---------------------|---------|--------------|---------|--------------|
|                                             |         | Cases (n)     | Rate per 100,000 PY | Model 1 |              | Model 2 |               | Cases (n) | Rate per 100,000 PY | Model 1 |              | Model 2          |              | Cases (n) | Rate per 100,000 PY | Model 1 |              | Model 2 |              |
|                                             |         |               |                     | HR      | 95% CI       | HR      | 95% CI        |           |                     | HR      | 95% CI       | HR               | 95% CI       |           |                     | HR      | 95% CI       |         |              |
| <b>&lt;60 years</b>                         |         |               |                     |         |              |         |               |           |                     |         |              |                  |              |           |                     |         |              |         |              |
| No asthma                                   | 384,436 | 802           | 22                  | 1.00    |              | 1.00    |               | 186       | 5                   | 1.00    |              | 1.00             |              | 319       | 9                   | 1.00    |              | 1.00    |              |
| Asthma                                      | 12,392  | 34            | 32                  | 1.30    | (0.92, 1.84) | 1.18    | (0.84, 1.66)  | 11        | 10                  | 1.76    | (0.96, 3.24) | 1.54             | (0.84, 2.85) | 12        | 11                  | 1.16    | (0.65, 2.06) | 1.10    | (0.62, 1.97) |
| Non-active asthma (history only)            | 10,237  | 18            | 21                  | 0.99    | (0.62, 1.58) | 0.97    | (0.61, 1.54)  | 6         | 7                   | 1.40    | (0.62, 3.15) | 1.32             | (0.58, 2.97) | 6         | 7                   | 0.83    | (0.37, 1.87) | 0.86    | (0.39, 1.94) |
| Active asthma (current drug use)            | 2,155   | 16            | 76                  | 2.02    | (1.23, 3.31) | 1.57    | (0.96, 2.58)  | 5         | 24                  | 2.57    | (1.06, 6.26) | 1.95             | (0.80, 4.78) | 6         | 29                  | 1.89    | (0.84, 4.24) | 1.53    | (0.68, 3.44) |
| <b>&gt;=60 years</b>                        |         |               |                     |         |              |         |               |           |                     |         |              |                  |              |           |                     |         |              |         |              |
| No asthma                                   | 46,993  | 1,961         | 421                 | 1.00    |              | 1.00    |               | 544       | 117                 | 1.00    |              | 1.00             |              | 759       | 163                 | 1.00    |              | 1.00    |              |
| Asthma                                      | 2,525   | 148           | 599                 | 1.27    | (1.07, 1.50) | 1.13    | (0.95, 1.33)  | 39        | 158                 | 1.20    | (0.87, 1.66) | 1.02             | (0.73, 1.41) | 56        | 227                 | 1.25    | (0.95, 1.64) | 1.16    | (0.88, 1.52) |
| Non-active asthma (history only)            | 1,366   | 66            | 479                 | 1.05    | (0.82, 1.34) | 0.97    | (0.76, 1.24)  | 19        | 138                 | 1.09    | (0.69, 1.71) | 0.96             | (0.61, 1.53) | 29        | 211                 | 1.19    | (0.82, 1.73) | 1.14    | (0.79, 1.65) |
| Active asthma (current drug use)            | 1,159   | 82            | 749                 | 1.52    | (1.22, 1.90) | 1.30    | (1.04, 1.63)  | 20        | 183                 | 1.33    | (0.85, 2.08) | 1.07             | (0.68, 1.68) | 27        | 247                 | 1.31    | (0.89, 1.92) | 1.18    | (0.80, 1.74) |
| <b>Age interaction p</b>                    |         |               |                     |         |              |         |               |           |                     |         |              |                  |              |           |                     |         |              |         |              |
| Asthma (yes/no)                             |         |               |                     | 0.85    |              | 0.50    |               |           |                     | 0.25    |              | 0.15             |              |           |                     | 0.85    |              | 1.00    |              |
| Asthma (no, history only, history and drug) |         |               |                     | 0.079   |              | 0.32    |               |           |                     | 0.15    |              | 0.22             |              |           |                     | 0.18    |              | 0.49    |              |

PY: person-years

Model 1: adjust for sex

Model 2: adjust for sex education, marital status, smoking, alcohol consumption, physical activity, diabetes, hypertension, body mass index, total cholesterol, triglyceride, history of heart disease/heart surgery/use of heart drug, and history of stroke

**Supplementary table 2. Hazard ratios (HRs) for the association of asthma with cardiovascular disease (CVD), coronary heart disease (CHD), and stroke mortality, excluding deaths<sup>a</sup> occurring during the two first years of follow-up, in the MJ health check-up programme, Taiwan**

|                                  | CVD mortality  |           |         |              |         |              | CHD mortality |         |              |         | Stroke mortality |           |         |              |         |              |
|----------------------------------|----------------|-----------|---------|--------------|---------|--------------|---------------|---------|--------------|---------|------------------|-----------|---------|--------------|---------|--------------|
|                                  | N <sup>a</sup> | Cases (n) | Model 1 |              | Model 2 |              | Cases (n)     | Model 1 |              | Model 2 |                  | Cases (n) | Model 1 |              | Model 2 |              |
|                                  |                |           | HR      | 95% CI       | HR      | 95% CI       |               | HR      | 95% CI       | HR      | 95% CI           |           | HR      | 95% CI       |         |              |
| No asthma                        | 431,200        | 2,534     | 1.00    |              | 1.00    |              | 661           | 1.00    |              | 1.00    |                  | 988       | 1.00    |              | 1.00    |              |
| Asthma                           | 14,896         | 161       | 1.23    | (1.05 ,1.44) | 1.10    | (0.94 ,1.29) | 44            | 1.26    | (0.93 ,1.71) | 1.07    | (0.79 ,1.46)     | 60        | 1.18    | (0.91 ,1.53) | 1.10    | (0.85 ,1.44) |
| Non-active asthma (history only) | 11,597         | 78        | 1.05    | (0.84 ,1.32) | 0.98    | (0.78 ,1.23) | 22            | 1.13    | (0.74 ,1.72) | 1.01    | (0.66 ,1.54)     | 33        | 1.14    | (0.81 ,1.61) | 1.11    | (0.78 ,1.57) |
| Active asthma (current drug use) | 3,299          | 83        | 1.47    | (1.18 ,1.83) | 1.24    | (1.00 ,1.55) | 22            | 1.46    | (0.98 ,2.17) | 1.15    | (0.75 ,1.76)     | 27        | 1.23    | (0.84 ,1.80) | 1.10    | (0.75 ,1.62) |

Model 1: adjust for age and sex

Model 2: adjust for age, education, marital status, smoking, alcohol consumption, physical activity, diabetes, hypertension, body mass index, total cholesterol, triglyceride, history of heart disease/heart surgery/use of heart drug, and history of stroke

<sup>a</sup> The number of deaths due to CVD, CHD, and stroke varied and thus the total number of participants after excluding deaths due to each of three causes differed.

**Supplementary Table 3. Hazard ratios (HRs) for the association of asthma with cardiovascular disease (CVD), coronary heart disease (CHD), and stroke mortality, excluding individuals with history of heart disease / heart surgery / use of heart drug, and history of stroke at baseline, in the MJ health check-up programme, Taiwan**

|                                  | N       | CVD mortality |         |              |         |              | CHD mortality |         |              |         |              | Stroke mortality |         |              |         |              |
|----------------------------------|---------|---------------|---------|--------------|---------|--------------|---------------|---------|--------------|---------|--------------|------------------|---------|--------------|---------|--------------|
|                                  |         | Cases (n)     | Model 1 |              | Model 2 |              | Cases (n)     | Model 1 |              | Model 2 |              | Cases (n)        | Model 1 |              | Model 2 |              |
|                                  |         |               | HR      | (95% CI)     | HR      | 95% CI       |               | HR      | 95% CI       | HR      | 95% CI       |                  | HR      | 95% CI       | HR      | 95% CI       |
| No asthma                        | 414,859 | 1,992         | 1.00    |              | 1.00    |              | 514           | 1.00    |              | 1.00    |              | 823              | 1.00    |              | 1.00    |              |
| Asthma                           | 13,802  | 108           | 1.16    | (0.96 ,1.41) | 1.15    | (0.95 ,1.39) | 23            | 0.94    | (0.62 ,1.43) | 0.92    | (0.60 ,1.40) | 42               | 1.10    | (0.81 ,1.50) | 1.09    | (0.80 ,1.49) |
| Non-active asthma (history only) | 10,935  | 51            | 0.94    | (0.71 ,1.25) | 0.95    | (0.72 ,1.26) | 13            | 0.92    | (0.53 ,1.60) | 0.91    | (0.52 ,1.58) | 21               | 0.94    | (0.61 ,1.45) | 0.97    | (0.63 ,1.50) |
| Active asthma (current drug use) | 2,867   | 57            | 1.47    | (1.13 ,1.92) | 1.41    | (1.08 ,1.84) | 10            | 0.96    | (0.52 ,1.80) | 0.93    | (0.50 ,1.75) | 21               | 1.32    | (0.85 ,2.03) | 1.25    | (0.81 ,1.93) |

Model 1: adjust for age and sex

Model 2: adjust for age, education, marital status, smoking, alcohol consumption, physical activity, diabetes, hypertension, body mass index, total cholesterol and triglycerides.

**Supplementary table 4. Hazard ratios (HRs) for the association of asthma with cardiovascular disease (CVD), coronary heart disease (CHD), and stroke mortality, excluding individuals with FEV1/FCV < 0.7 at baseline, in the MJ health check-up programme, Taiwan**

|                                  | N       | CVD mortality |         |              |         |              | CHD mortality |         |              |         |              | Stroke mortality |         |              |         |              |
|----------------------------------|---------|---------------|---------|--------------|---------|--------------|---------------|---------|--------------|---------|--------------|------------------|---------|--------------|---------|--------------|
|                                  |         | Cases (n)     | Model 1 |              | Model 2 |              | Cases (n)     | Model 1 |              | Model 2 |              | Cases (n)        | Model 1 |              | Model 2 |              |
|                                  |         |               | HR      | (95% CI)     | HR      | 95% CI       |               | HR      | 95% CI       | HR      | 95% CI       |                  | HR      | 95% CI       | HR      | 95% CI       |
| No asthma                        | 352,774 | 2,319         | 1.00    |              | 1.00    |              | 617           | 1.00    |              | 1.00    |              | 902              | 1.00    |              | 1.00    |              |
| Asthma                           | 11,074  | 117           | 1.27    | (1.06 ,1.53) | 1.12    | (0.93 ,1.36) | 32            | 1.29    | (0.90 ,1.84) | 1.08    | (0.76 ,1.55) | 46               | 1.29    | (0.96 ,1.73) | 1.21    | (0.90 ,1.63) |
| Non-active asthma (history only) | 8,835   | 60            | 1.05    | (0.81 ,1.36) | 0.98    | (0.76 ,1.27) | 19            | 1.25    | (0.79 ,1.97) | 1.11    | (0.70 ,1.76) | 25               | 1.13    | (0.76 ,1.68) | 1.11    | (0.75 ,1.66) |
| Active asthma (current drug use) | 2,239   | 57            | 1.62    | (1.25 ,2.11) | 1.33    | (1.02 ,1.73) | 13            | 1.36    | (0.78 ,2.35) | 1.05    | (0.60 ,1.82) | 21               | 1.55    | (1.01 ,2.39) | 1.36    | (0.88 ,2.10) |

Model 1: adjust for age and sex

Model 2: adjust for age, education, marital status, smoking, alcohol consumption, physical activity, diabetes, hypertension, body mass index, total cholesterol, triglyceride, history of heart disease/heart surgery/use of heart drug, and history of stroke

**Supplementary Table 5. Hazard ratios (HRs) for the association of asthma with cardiovascular disease (CVD), coronary heart disease (CHD), and stroke mortality by smoking status in the MJ health check-up programme, Taiwan**

|                                             | N       | CVD mortality |         |              |         | CHD mortality |           |         |              | Stroke mortality |              |           |         |              |         |              |
|---------------------------------------------|---------|---------------|---------|--------------|---------|---------------|-----------|---------|--------------|------------------|--------------|-----------|---------|--------------|---------|--------------|
|                                             |         | Cases (n)     | Model 1 |              | Model 2 |               | Cases (n) | Model 1 |              | Model 2          |              | Cases (n) | Model 1 |              | Model 2 |              |
|                                             |         |               | HR      | 95% CI       | HR      | 95% CI        |           | HR      | 95% CI       | HR               | 95% CI       |           | HR      | 95% CI       |         |              |
| <b>Non or ex-smoker</b>                     |         |               |         |              |         |               |           |         |              |                  |              |           |         |              |         |              |
| No asthma                                   | 332,699 | 1,898         | 1.00    |              | 1.00    |               | 470       | 1.00    |              | 1.00             |              | 754       | 1.00    |              | 1.00    |              |
| Asthma                                      | 11,456  | 113           | 1.15    | (0.95, 1.39) | 1.04    | (0.86, 1.25)  | 30        | 1.20    | (0.83, 1.73) | 1.03             | (0.71, 1.50) | 40        | 1.03    | (0.75, 1.42) | 0.98    | (0.71, 1.35) |
| Non-active asthma (history only)            | 9,018   | 56            | 1.00    | (0.77, 1.31) | 0.94    | (0.72, 1.23)  | 16        | 1.15    | (0.70, 1.89) | 1.04             | (0.63, 1.72) | 24        | 1.09    | (0.72, 1.63) | 1.07    | (0.71, 1.61) |
| Active asthma (current drug use)            | 2,438   | 57            | 1.33    | (1.02, 1.74) | 1.14    | (0.88, 1.49)  | 14        | 1.26    | (0.74, 2.14) | 1.02             | (0.60, 1.75) | 16        | 0.96    | (0.59, 1.58) | 0.87    | (0.53, 1.43) |
| <b>Current smoker</b>                       |         |               |         |              |         |               |           |         |              |                  |              |           |         |              |         |              |
| No asthma                                   | 98,730  | 865           | 1.00    |              | 1.00    |               | 260       | 1.00    |              | 1.00             |              | 324       | 1.00    |              | 1.00    |              |
| Asthma                                      | 3,461   | 69            | 1.55    | (1.21, 1.98) | 1.34    | (1.04, 1.71)  | 20        | 1.45    | (0.92, 2.29) | 1.20             | (0.75, 1.90) | 28        | 1.67    | (1.13, 2.45) | 1.51    | (1.02, 2.23) |
| Non-active asthma (history only)            | 2,585   | 28            | 1.13    | (0.78, 1.65) | 1.01    | (0.69, 1.48)  | 9         | 1.18    | (0.61, 2.30) | 1.01             | (0.52, 1.97) | 11        | 1.19    | (0.65, 2.17) | 1.11    | (0.61, 2.04) |
| Active asthma (current drug use)            | 876     | 41            | 2.07    | (1.51, 2.84) | 1.72    | (1.25, 2.36)  | 11        | 1.78    | (0.97, 3.25) | 1.41             | (0.77, 2.60) | 17        | 2.26    | (1.38, 3.69) | 1.97    | (1.20, 3.23) |
| <b>Smoking status interaction p</b>         |         |               |         |              |         |               |           |         |              |                  |              |           |         |              |         |              |
| Asthma (yes/no)                             |         |               |         |              | 0.18    |               |           |         |              | 0.74             |              |           |         |              | 0.12    |              |
| Asthma (no, history only, history and drug) |         |               |         |              | 0.27    |               |           |         |              | 0.82             |              |           |         |              | 0.088   |              |

Model 1: adjust for age

Model 2: adjust for age, education, marital status, alcohol consumption, physical activity, diabetes, hypertension, body mass index, total cholesterol, triglyceride, history of heart disease/heart surgery/use of heart drug, and history of stroke
